# Supplementary material for: A novel high-entropy sulfide (ZnCoMnFeAlMg)9S8 as a low potential and long life electrocatalyst for overall water splitting in experiments and DFT analysis
Source: Royal Society of Chemistry journal article supplement (doi:10.1039/d3gc03800a), 2023-11-23
Supplement: d3gc03800a1.pdf [file d3gc03800a1.pdf]

# Supplementary Material

## Novel high-entropy sulfide (ZnCoMnFeAlMg)<sub>9</sub>S<sub>8</sub> as low potential and long life electrocatalyst for overall water splitting in experiments and DFT analysis

Shun Li<sup>a</sup>, Likai Tong<sup>a</sup>, Zhijian Peng<sup>b</sup>, Bo Zhang<sup>a</sup> and Xiuli Fu<sup>a,\*</sup>

<sup>a</sup> School of Integrated Circuits, Beijing University of Posts and Telecommunications, Beijing

100876, P. R. China

<sup>b</sup> School of Science, China University of Geosciences, Beijing 100083, P. R. China

### Corresponding authors

\* Telephone: 86-10-62282452. Fax: 86-10-62282054

E-mail: xiulifu@bupt.edu.cn (X. Fu)

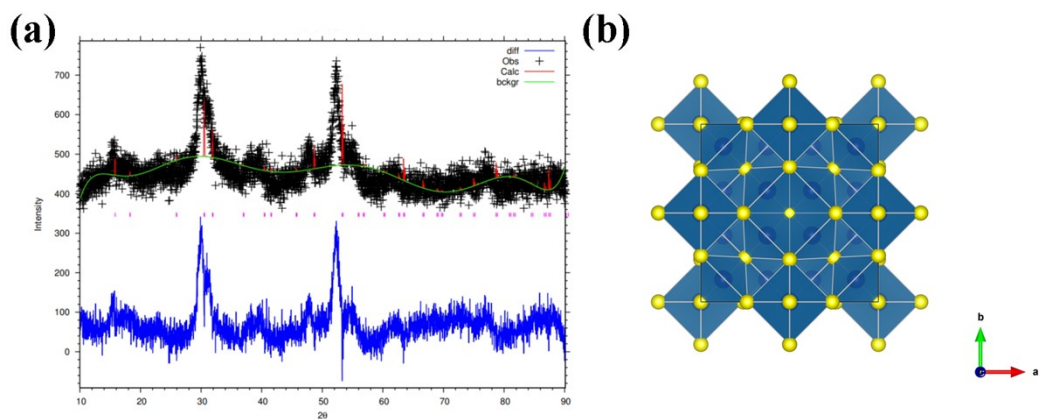

Fig. S1 (a) The refined XRD pattern and (b) schematic representation of the crystal structure for  $(\text{ZnCoMnFeAlMg})_9\text{S}_8$ .

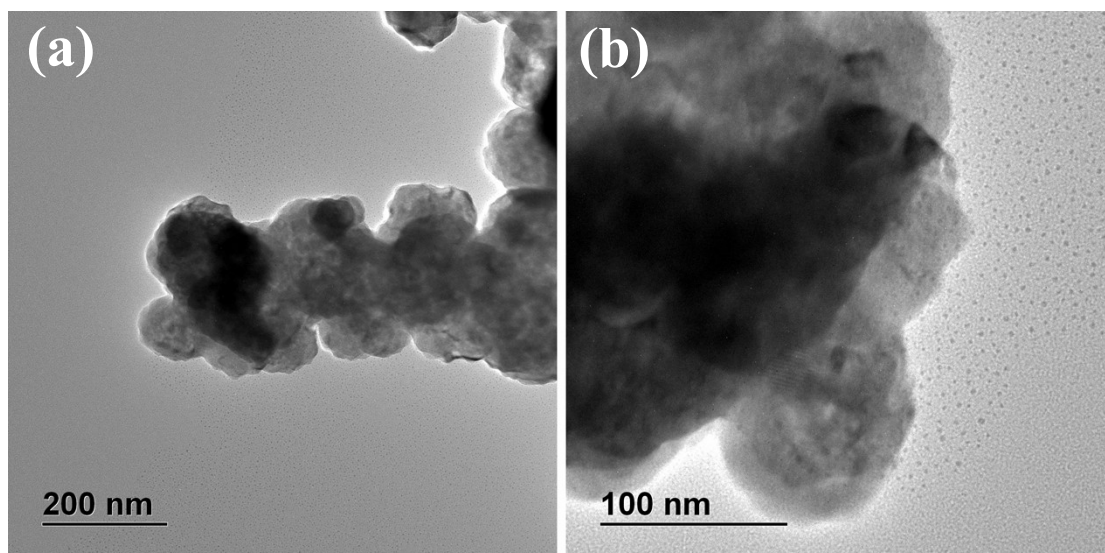

Fig. S2 Different magnification TEM images of  $(\text{ZnCoMnFeAlMg})_9\text{S}_8$ .

It is obvious that the structure of  $(\text{ZnCoMnFeAlMg})_9\text{S}_8$  is nanoscale fragments.

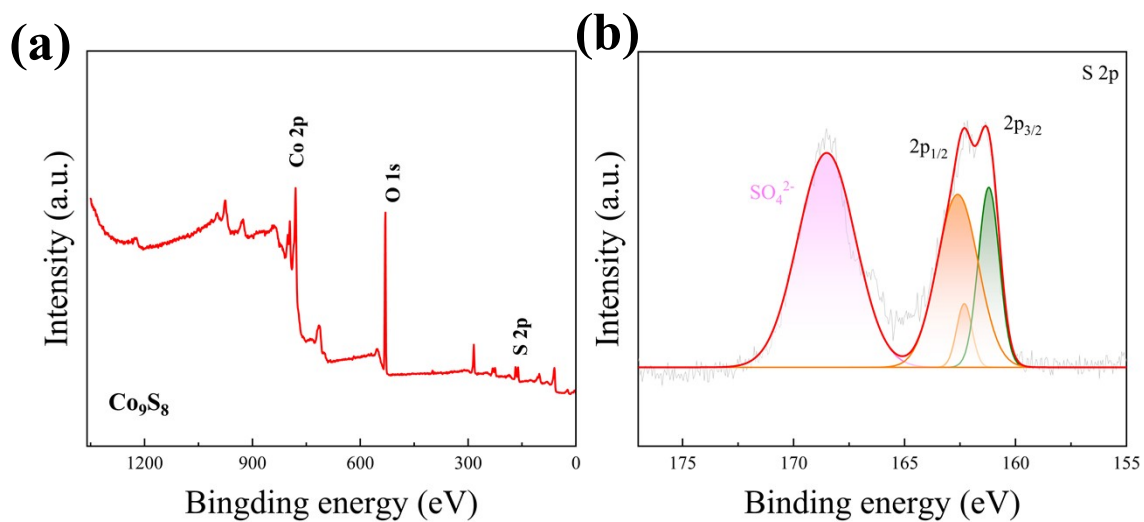

Fig. S3 XPS data of  $\text{Co}_9\text{S}_8$ . (a) XPS survey spectrum and (b) S 2p.

In brief, the spectrum indicates the presence of cobalt (Co 2p), sulfur (S 2p), and oxygen (O 1s). The S 2p spectrum of  $\text{Co}_9\text{S}_8$  shown in Fig. S2(b) indicates the dominance of  $\text{S}^{2-}$  and bridging  $\text{S}_2^{2-}$  species, confirming the formation of  $\text{Co}_9\text{S}_8$ . Besides, a small amount of  $\text{SO}_4^{2-}$  ions can be detected, which combines with multivalent metal species to enhance the overall water splitting performance

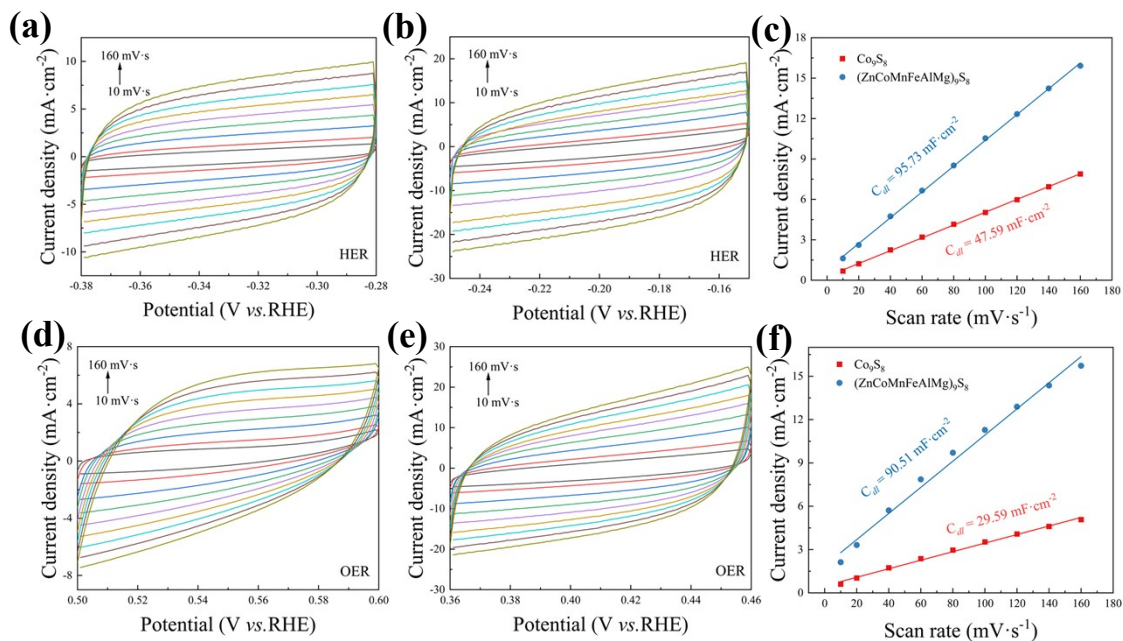

Fig. S4 Cyclic voltammograms of (a,d)  $\text{Co}_9\text{S}_8$ , and (b,e)  $(\text{ZnCoMnFeAlMg})_9\text{S}_8$ . Capacitance current as a function of scan rates (c)  $\text{Co}_9\text{S}_8$ , (f)  $(\text{ZnCoMnFeAlMg})_9\text{S}_8$ .

In order to obtain ECSA, CV tests were conducted on  $\text{Co}_9\text{S}_8$  and  $(\text{ZnCoMnFeAlMg})_9\text{S}_8$  at 10–160  $\text{mV s}^{-1}$ . The results show that for both the HER process and the OER process, the fitted  $C_{dl}$  values of  $(\text{ZnCoMnFeAlMg})_9\text{S}_8$  are higher than those of  $\text{Co}_9\text{S}_8$ .

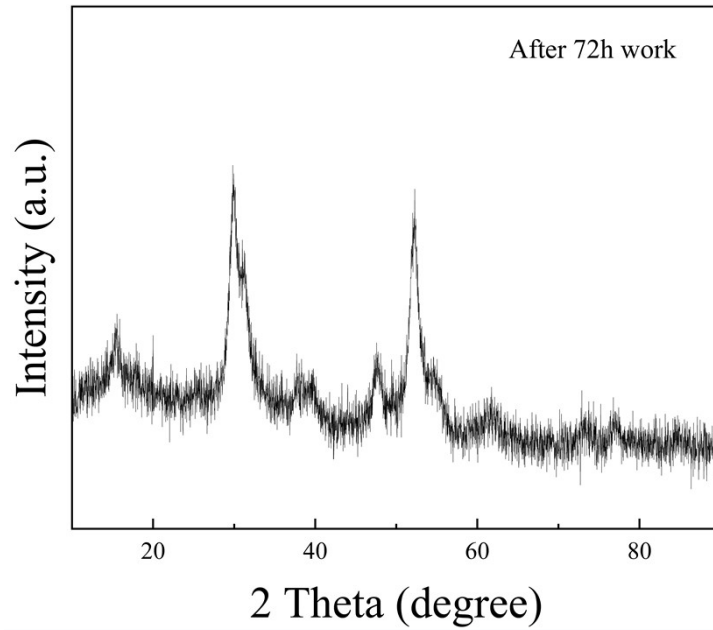

Fig. S5 XRD pattern of the  $(\text{ZnCoMnFeAlMg})_9\text{S}_8$  after 72 h work.

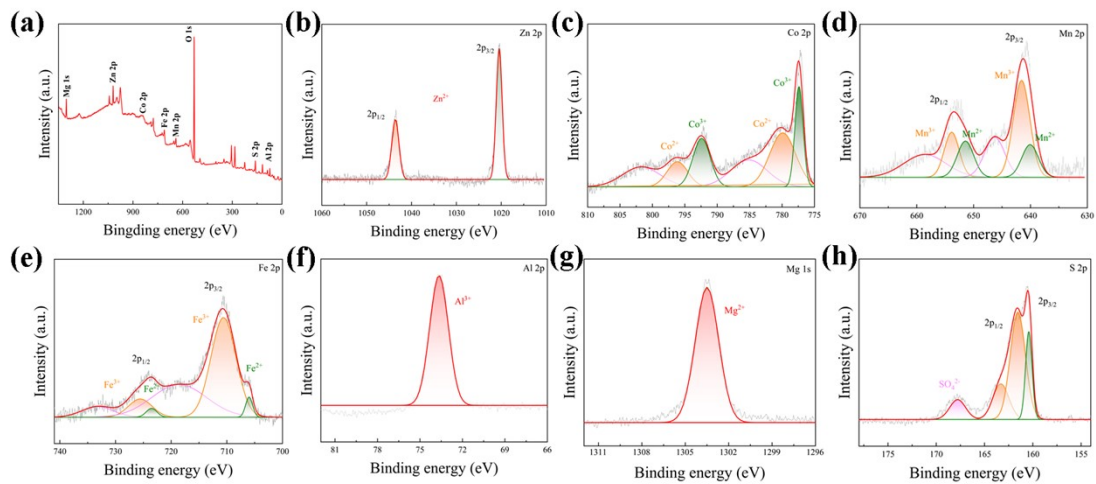

Fig. S6 XPS data of  $(\text{ZnCoMnFeAlMg})_9\text{S}_8$  after 72 h work. (a) survey spectrum and high-resolution spectra of (b) Zn 2p, (c) Co 2p, (d) Mn 2p, (e) Fe 2p, (f) Al 2p, (g) Mg 1s, and (h) S 2p.

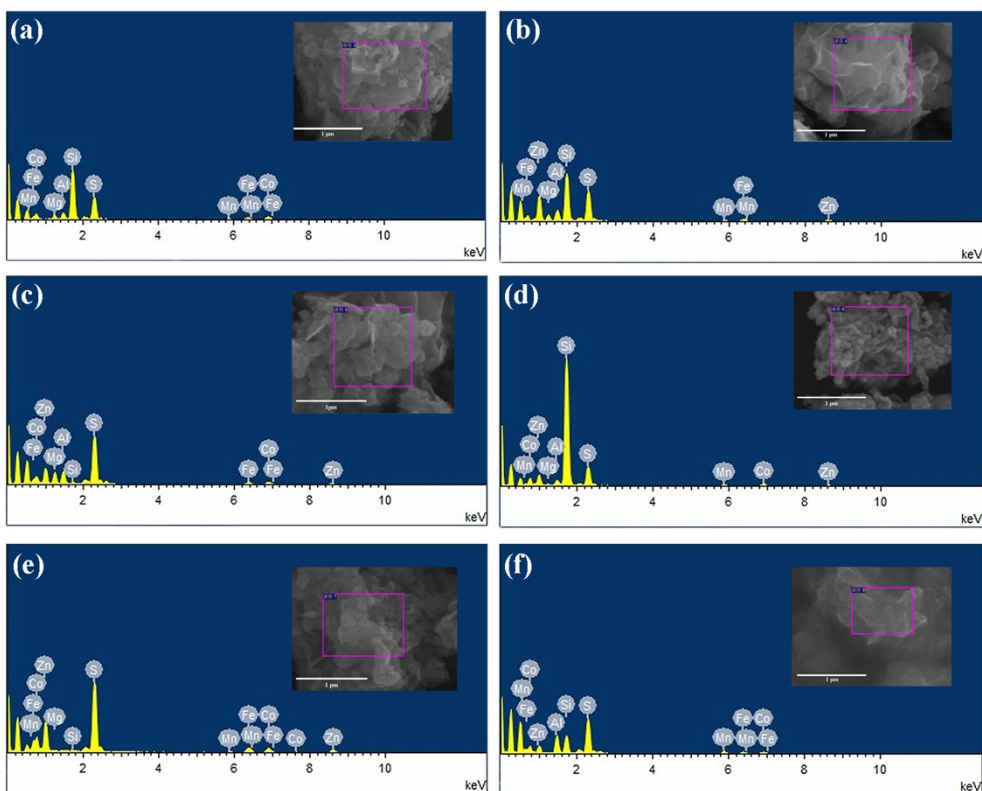

Fig. S7 The EDS results after removing one metal element from  $(\text{ZnCoMnFeAlMg})_9\text{S}_8$  are presented. (a)  $(\text{CoMnFeAlMg})_9\text{S}_8$ , (b)  $(\text{ZnMnFeAlMg})_9\text{S}_8$ , (c)  $(\text{ZnCoFeAlMg})_9\text{S}_8$ , (d)  $(\text{ZnCoMnAlMg})_9\text{S}_8$ , (e)  $(\text{ZnCoMnFeMg})_9\text{S}_8$ , and (f)  $(\text{ZnCoMnFeAl})_9\text{S}_8$ .

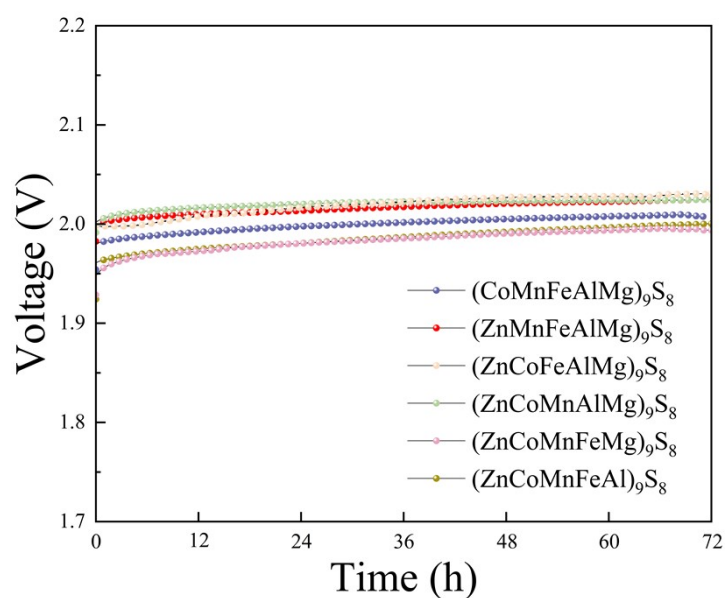

Fig. S8 Comparison of the working stability and overpotential among different catalysts.

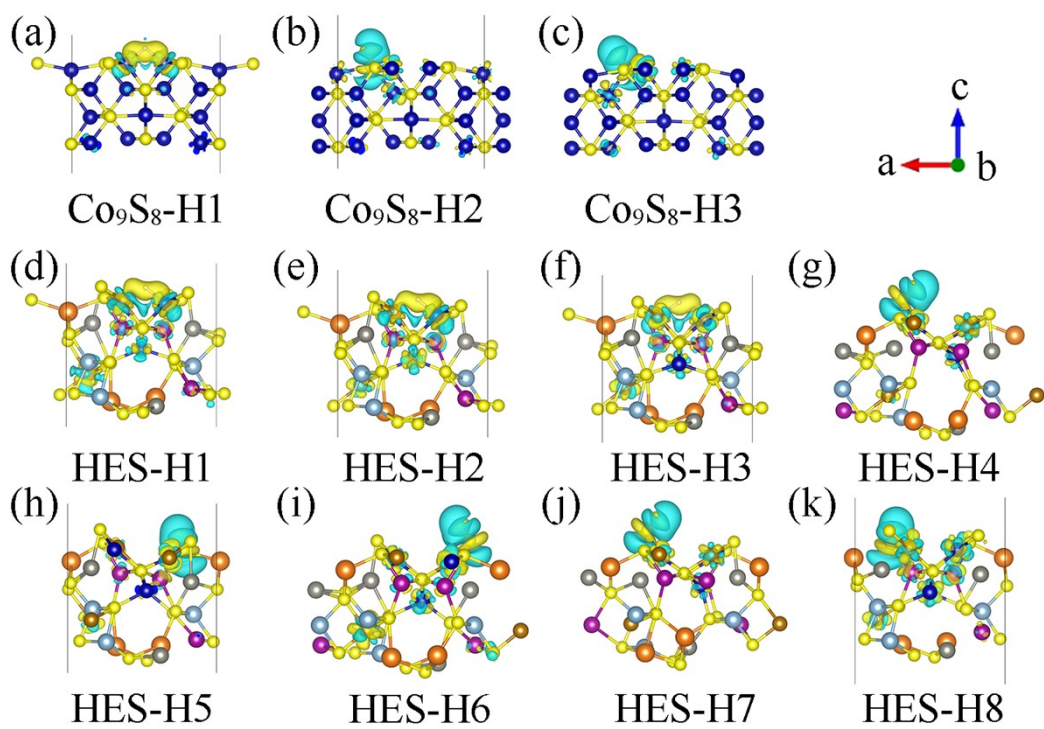

Fig. S9 Charge density difference for the  $\text{H}^*$  adsorbed on (a-c)  $\text{Co}_9\text{S}_8$  and (d-k)  $(\text{ZnCoMnFeAlMg})_9\text{S}_8$

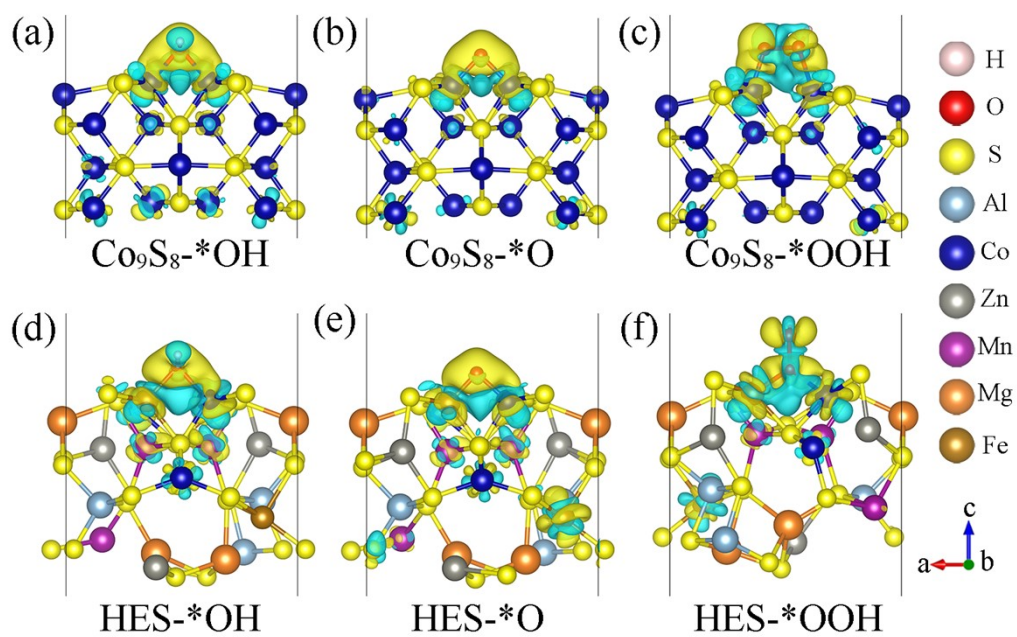

Fig. S10 Charge density difference for the  $\text{OOH}^*$  adsorbed on (a-c)  $\text{Co}_9\text{S}_8$  and (d-f)  $(\text{ZnCoMnFeAlMg})_9\text{S}_8$



Table. S1. The atomic positions in the obtained HES structure are as follows.

|     | x       | y       | z       |     | x       | y       | z       |
|-----|---------|---------|---------|-----|---------|---------|---------|
| M1  | 0.12641 | 0.12641 | 0.12641 | S1  | 0       | 0       | 0.26121 |
| M2  | 0.87359 | 0.87359 | 0.87359 | S2  | 0       | 0       | 0.73879 |
| M3  | 0.87359 | 0.87359 | 0.12641 | S3  | 0.26121 | 0       | 0       |
| M4  | 0.12641 | 0.12641 | 0.87359 | S4  | 0.73879 | 0       | 0       |
| M5  | 0.87359 | 0.12641 | 0.87359 | S5  | 0       | 0.26121 | 0       |
| M6  | 0.12641 | 0.87359 | 0.12641 | S6  | 0       | 0.73879 | 0       |
| M7  | 0.12641 | 0.87359 | 0.87359 | S7  | 0       | 0.5     | 0.76121 |
| M8  | 0.87359 | 0.12641 | 0.12641 | S8  | 0       | 0.5     | 0.23879 |
| M9  | 0.12641 | 0.62641 | 0.62641 | S9  | 0.26121 | 0.5     | 0.5     |
| M10 | 0.87359 | 0.37359 | 0.37359 | S10 | 0.73879 | 0.5     | 0.5     |
| M11 | 0.87359 | 0.37359 | 0.62641 | S11 | 0       | 0.76121 | 0.5     |
| M12 | 0.12641 | 0.62641 | 0.37359 | S12 | 0       | 0.23879 | 0.5     |
| M13 | 0.87359 | 0.62641 | 0.37359 | S13 | 0.5     | 0       | 0.76121 |
| M14 | 0.12641 | 0.37359 | 0.62641 | S14 | 0.5     | 0       | 0.23879 |
| M15 | 0.12641 | 0.37359 | 0.37359 | S15 | 0.76121 | 0       | 0.5     |
| M16 | 0.87359 | 0.62641 | 0.62641 | S16 | 0.23879 | 0       | 0.5     |
| M17 | 0.62641 | 0.12641 | 0.62641 | S17 | 0.5     | 0.26121 | 0.5     |
| M18 | 0.37359 | 0.87359 | 0.37359 | S18 | 0.5     | 0.73879 | 0.5     |
| M19 | 0.37359 | 0.87359 | 0.62641 | S19 | 0.5     | 0.5     | 0.26121 |
| M20 | 0.62641 | 0.12641 | 0.37359 | S20 | 0.5     | 0.5     | 0.73879 |
| M21 | 0.37359 | 0.12641 | 0.37359 | S21 | 0.76121 | 0.5     | 0       |
| M22 | 0.62641 | 0.87359 | 0.62641 | S22 | 0.23879 | 0.5     | 0       |
| M23 | 0.62641 | 0.87359 | 0.37359 | S23 | 0.5     | 0.76121 | 0       |
| M24 | 0.37359 | 0.12641 | 0.62641 | S24 | 0.5     | 0.23879 | 0       |
| M25 | 0.62641 | 0.62641 | 0.12641 | S25 | 0.25    | 0.25    | 0.25    |
| M26 | 0.37359 | 0.37359 | 0.87359 | S26 | 0.75    | 0.75    | 0.75    |
| M27 | 0.37359 | 0.37359 | 0.12641 | S27 | 0.75    | 0.75    | 0.25    |
| M28 | 0.62641 | 0.62641 | 0.87359 | S28 | 0.25    | 0.25    | 0.75    |
| M29 | 0.37359 | 0.62641 | 0.87359 | S29 | 0.75    | 0.25    | 0.75    |
| M30 | 0.62641 | 0.37359 | 0.12641 | S30 | 0.25    | 0.75    | 0.25    |
| M31 | 0.62641 | 0.37359 | 0.87359 | S31 | 0.25    | 0.75    | 0.75    |
| M32 | 0.37359 | 0.62641 | 0.12641 | S32 | 0.75    | 0.25    | 0.25    |
| M33 | 0       | 0       | 0.5     |     |         |         |         |
| M34 | 0.5     | 0       | 0       |     |         |         |         |
| M35 | 0       | 0.5     | 0       |     |         |         |         |
| M36 | 0.5     | 0.5     | 0.5     |     |         |         |         |

Table. S2 Sulfide-based dual-functional electrocatalysts and other commercial electrocatalysts for overall water splitting.

| Electrocatalyst                                     | HER                       | OER                       | Overall                  | Stability | Ref.      |
|-----------------------------------------------------|---------------------------|---------------------------|--------------------------|-----------|-----------|
|                                                     | [mV@mA cm <sup>-2</sup> ] | [mV@mA cm <sup>-2</sup> ] | [V@mA cm <sup>-2</sup> ] |           |           |
| Co <sub>9</sub> S <sub>8</sub> @Ni(OH) <sub>2</sub> | 100@10                    | 250@60                    | 1.55@10                  | 10 h      | [35]      |
| CoS–Co(OH) <sub>2</sub> @MoS <sub>2+x</sub>         | 143@10                    | 380@10                    | 1.58@10                  | 11 h      | [6]       |
| Co <sub>3</sub> S <sub>4</sub> @MoS <sub>2</sub>    | 136@10                    | 280@20                    | 1.58@10                  | 10 h      | [36]      |
| (Ni, Fe)S <sub>2</sub> @MoS <sub>2</sub>            | 130@10                    | 270@10                    | 1.56@10                  | 45 h      | [37]      |
| Se–MnS/NiS                                          | 56@10                     | 211@10                    | 1.47@10                  | 48 h      | [38]      |
| V–Ni <sub>3</sub> S <sub>2</sub>                    | 133@10                    | 148@10                    | 1.42@10                  | 60 h      | [39]      |
| N-CNTs/NiS <sub>2</sub> @Mo <sub>2</sub> C          | 227@10                    | 320@10                    | 1.52@10                  | 24 h      | [40]      |
| N-Ni <sub>3</sub> S <sub>2</sub> /VS <sub>2</sub>   | 151@10                    | 227@10                    | 1.65@10                  | 20 h      | [41]      |
| Pt/C/NF//RuO <sub>2</sub> /NF                       |                           |                           | 1.71@10                  |           | [42]      |
| RuO <sub>2</sub> /NF                                |                           | 290@10                    |                          |           | [43]      |
| Pt/C/NF                                             | 30@10                     |                           |                          |           | [43]      |
| (ZnCoMnFeAlMg) <sub>9</sub> S <sub>8</sub> /NF      | 160@10                    | 170@10                    | 1.39@10                  | 72 h      | This work |

Table. S3 Statistical table of  $\text{Co}_9\text{S}_8$  adsorption sites and corresponding Gibbs free energies.

| adsorption sites            | placed sites                                                                      | stabilized sites                                                                   | $\Delta G$ (eV) |
|-----------------------------|-----------------------------------------------------------------------------------|------------------------------------------------------------------------------------|-----------------|
| $\text{Co}_9\text{S}_8$ -H1 | 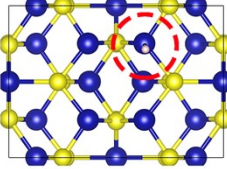 |  | -0.34           |
| $\text{Co}_9\text{S}_8$ -H2 |  |  | 1.06            |
| $\text{Co}_9\text{S}_8$ -H3 |  |  | 0.68            |

Table. S4 Statistical table of  $(\text{ZnCoMnFeAlMg})_9\text{S}_8$  adsorption sites and corresponding Gibbs free energies.

| adsorption sites | placed sites                                                                        | stabilized sites                                                                     | $\Delta G$ (eV) |
|------------------|-------------------------------------------------------------------------------------|--------------------------------------------------------------------------------------|-----------------|
| HES-H1           | 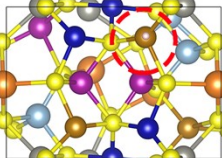   |    | -0.08           |
| HES-H2           |    |    | 0.30            |
| HES-H3           |    |    | 0.04            |
| HES-H4           |   |   | 0.02            |
| HES-H5           |  |  | 0.82            |
| HES-H6           |  |  | 0.72            |
| HES-H7           |  |  | -0.79           |
| HES-H8           |  |  | 1.45            |
